# Supplementary material for: SumVg: Total Heritability Explained by All Variants in Genome-Wide Association Studies Based on Summary Statistics with Standard Error Estimates
Source: MDPI journal article supplement (doi:10.3390/ijms25021347), 2024-01-22
Supplement: s1 [file s1]

Figure S1 Bar plot of number of pruned SNPs, the sum of variance explained, and SE estimated by different approaches for 12 immune traits (under different  $r^2$  pruning thresholds)

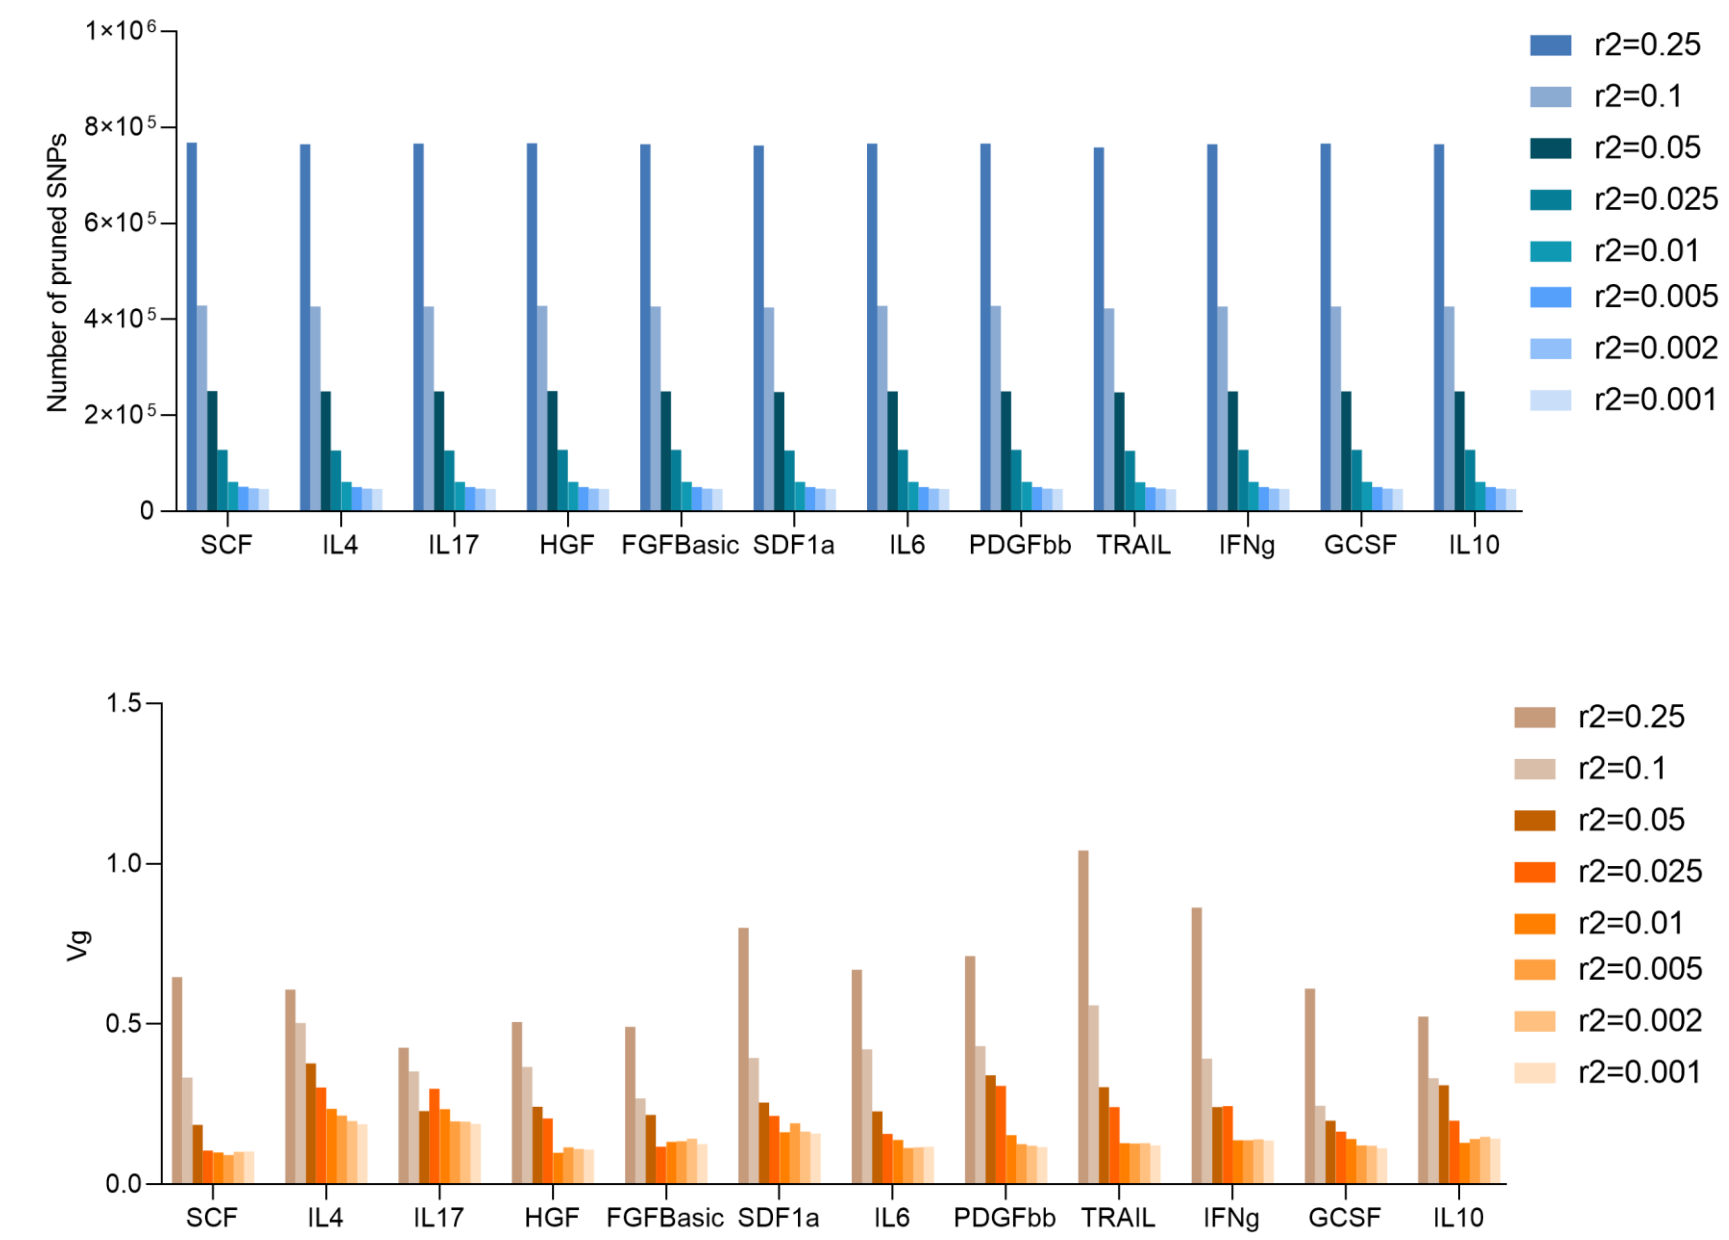

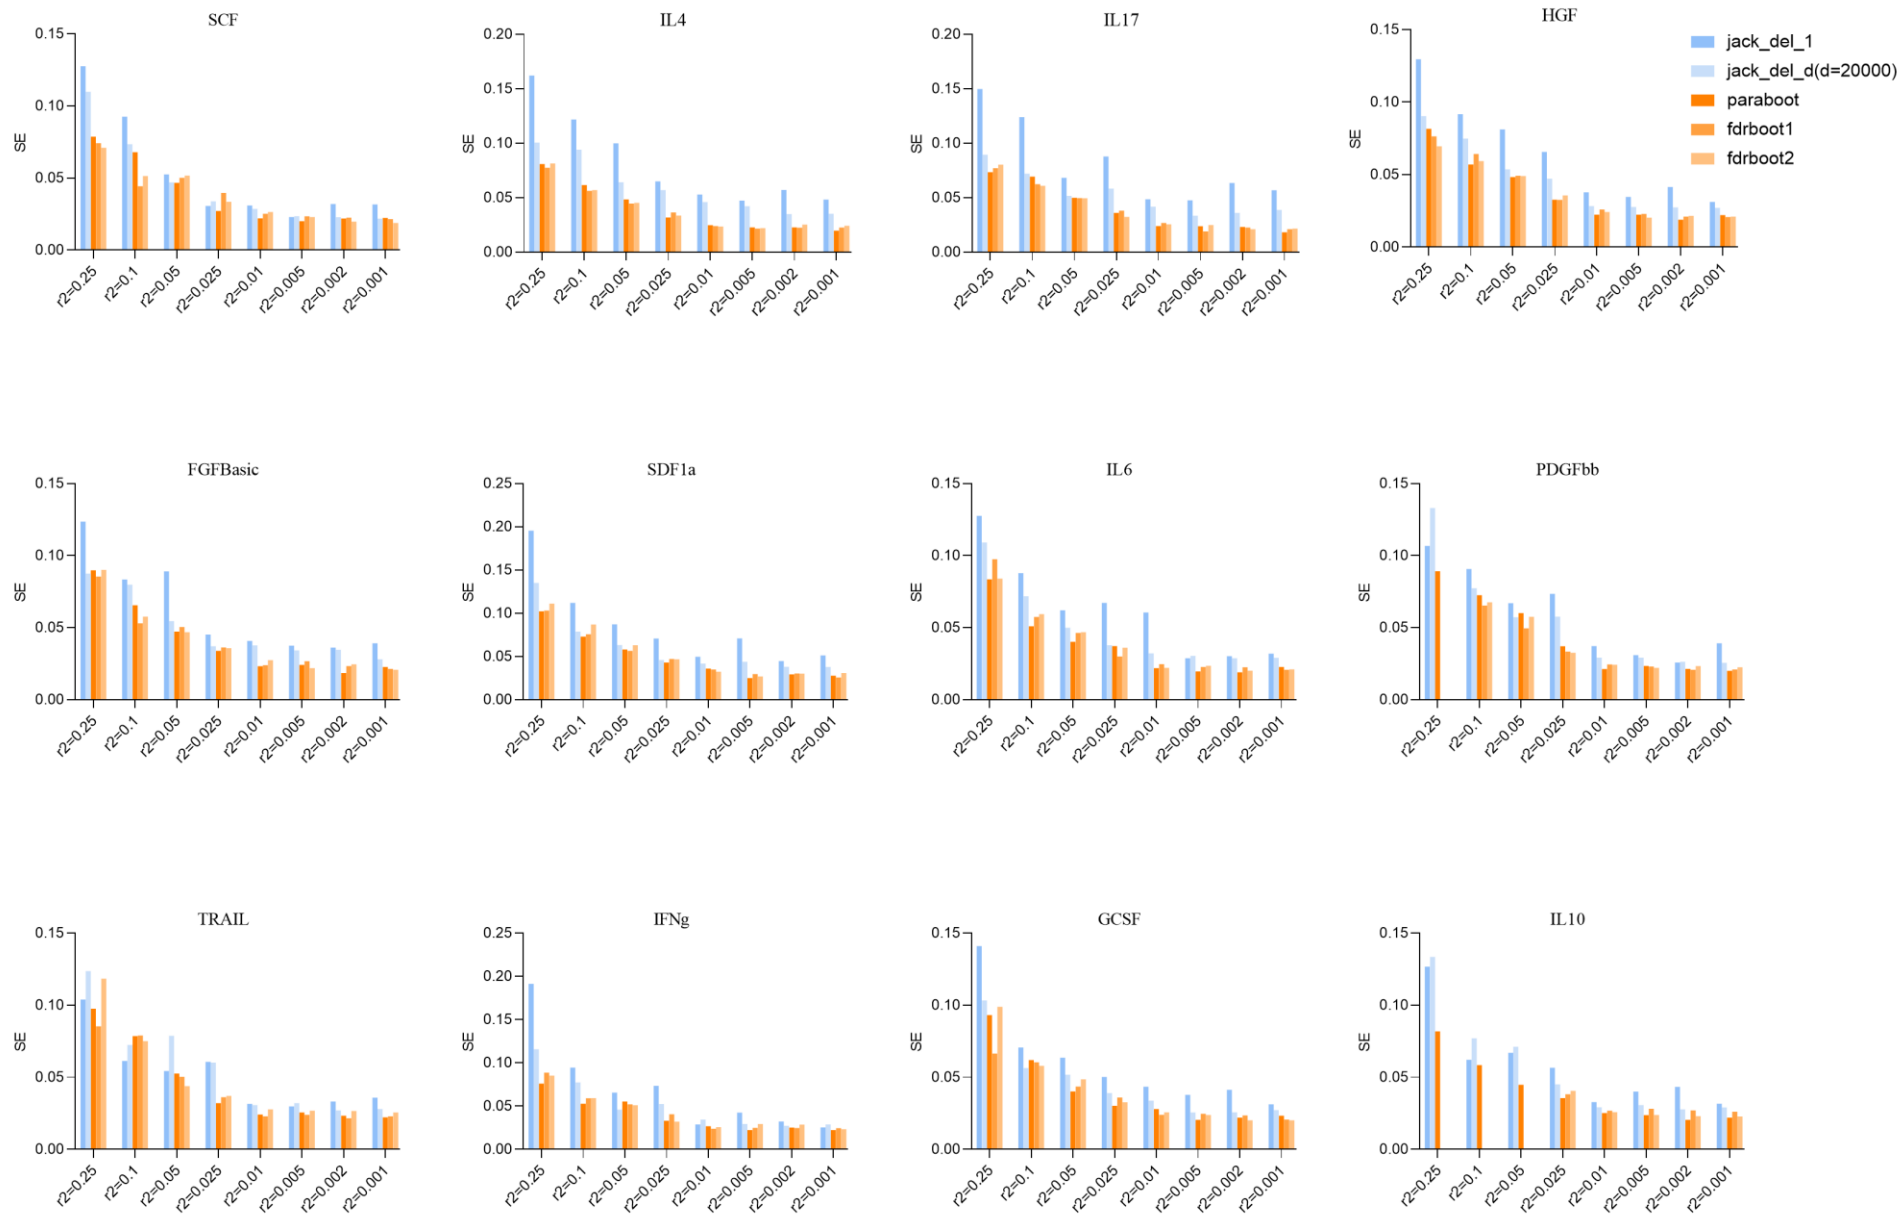

$r^2$  is the pruning threshold, and  $V_g$  is the sum of variance explained that was estimated by SumVg. jack\_del\_1, jack\_del\_d, paraboot, fdrboot1 and fdrboot2 are different SE estimation approaches as described above.
