# Supplementary material for: SumVg: Total Heritability Explained by All Variants in Genome-Wide Association Studies Based on Summary Statistics with Standard Error Estimates
Source: Int J Mol Sci. 2024 Jan 22;25(2):1347. doi: 10.3390/ijms25021347 (PMC10816209; doi:10.3390/ijms25021347)
Supplement: Supplementary file 1 [file ijms-25-01347-s001.zip › Supplementary Tables.xlsx]

## Sheet: S1.1 standard CI (no bias corr)
Table S1.1	Coverage of the standard CI without bias correction
True Sum_Vg	N	SE.fdrboot1	SE.fdrboot2	SE.jack1	SE.jack_del_d	SE.paraboot
0.295	5000	0.76	0.72	0.84	0.74	0.72
	10000	0.16	0.11	0.25	0.18	0.11
	20000	0.09	0.12	0.25	0.16	0.12
	50000	0.67	0.51	0.66	0.99	0.52
	100000	0.15	0.16	0.56	1	0.13
	200000	0	0	0.36	0.88	0
0.191	5000	0.92	0.93	0.98	0.97	0.91
	10000	0.71	0.64	0.72	0.63	0.62
	20000	0.43	0.4	0.53	0.44	0.4
	50000	0.26	0.19	0.43	0.77	0.2
	100000	0.84	0.81	0.88	1	0.8
	200000	0	0	0.37	1	0
0.101	5000	0.55	0.57	0.89	0.65	0.58
	10000	0.92	0.92	0.97	0.93	0.92
	20000	0.96	0.96	0.96	0.95	0.95
	50000	0.5	0.64	0.69	0.81	0.6
	100000	0.55	0.34	0.55	0.99	0.33
	200000	0.43	0.36	0.64	1	0.31
The column for del-d-jackknife was highlighted as it is the primary method we used for constructing standard CI (normal approximation).

## Sheet: S1.2 bias-corr standard CI
Table S1.2	Coverage of the standard CI with bias correction
True Sum_Vg	N		SE.fdrboot1	SE.fdrboot2	SE.jack1	SE.jack_del_d	SE.paraboot
0.295	5000	fdrboot1	0.28	0.28	0.42	0.36	0.28
		fdrboot2	0.63	0.61	0.73	0.62	0.58
		paraboot	0.63	0.6	0.73	0.6	0.58
	10000	fdrboot1	0.06	0.04	0.09	0.06	0.04
		fdrboot2	0.58	0.55	0.68	0.56	0.54
		paraboot	0.56	0.54	0.65	0.55	0.52
	20000	fdrboot1	0.04	0.05	0.12	0.06	0.05
		fdrboot2	0.74	0.76	0.83	0.84	0.76
		paraboot	0.74	0.77	0.8	0.79	0.76
	50000	fdrboot1	0	0	0.05	0.02	0
		fdrboot2	0.4	0.33	0.58	0.87	0.31
		paraboot	0.45	0.32	0.6	0.89	0.33
	100000	fdrboot1	0.35	0.33	0.6	0.74	0.3
		fdrboot2	0	0	0.28	0.26	0
		paraboot	0	0	0.29	0.3	0
	200000	fdrboot1	0.11	0.14	0.45	0.9	0.1
		fdrboot2	0	0	0.27	0.28	0
		paraboot	0	0	0.28	0.26	0
0.191	5000	fdrboot1	0.59	0.55	0.7	0.56	0.56
		fdrboot2	0.68	0.63	0.87	0.73	0.65
		paraboot	0.71	0.68	0.85	0.75	0.66
	10000	fdrboot1	0.2	0.15	0.3	0.22	0.17
		fdrboot2	0.65	0.6	0.69	0.62	0.61
		paraboot	0.63	0.59	0.66	0.61	0.61
	20000	fdrboot1	0.13	0.1	0.28	0.15	0.11
		fdrboot2	0.74	0.73	0.78	0.73	0.72
		paraboot	0.76	0.72	0.78	0.76	0.73
	50000	fdrboot1	0	0	0.05	0	0
		fdrboot2	0.78	0.77	0.85	0.96	0.77
		paraboot	0.81	0.79	0.86	0.97	0.77
	100000	fdrboot1	0.38	0.32	0.52	0.75	0.31
		fdrboot2	0.04	0.03	0.3	0.66	0.03
		paraboot	0.04	0.03	0.33	0.74	0.03
	200000	fdrboot1	0.12	0.16	0.49	0.97	0.13
		fdrboot2	0	0	0.22	0.35	0
		paraboot	0	0	0.22	0.4	0
0.101	5000	fdrboot1	0.54	0.55	0.73	0.57	0.56
		fdrboot2	0.55	0.56	0.7	0.6	0.56
		paraboot	0.56	0.56	0.72	0.6	0.58
	10000	fdrboot1	0.65	0.65	0.74	0.66	0.64
		fdrboot2	0.73	0.72	0.85	0.71	0.72
		paraboot	0.73	0.7	0.85	0.73	0.69
	20000	fdrboot1	0.49	0.51	0.62	0.55	0.5
		fdrboot2	0.76	0.77	0.84	0.77	0.77
		paraboot	0.78	0.79	0.85	0.78	0.78
	50000	fdrboot1	0.09	0.12	0.22	0.15	0.12
		fdrboot2	0.76	0.81	0.85	0.86	0.79
		paraboot	0.77	0.84	0.85	0.88	0.81
	100000	fdrboot1	0	0	0.09	0.09	0
		fdrboot2	0.67	0.52	0.72	0.98	0.52
		paraboot	0.71	0.55	0.77	0.99	0.55
	200000	fdrboot1	0.53	0.48	0.67	0.93	0.46
		fdrboot2	0	0	0.23	0.5	0
		paraboot	0	0	0.23	0.58	0

## Sheet: S1.3 Percentile CI
Table S1.3	Coverage of the percentile CI with and without bias correction
True Sum_Vg	N		fdrboot1	fdrboot2	paraboot
0.295	5000	original	0.84	0.92	0.9
		bias-corrected	0.26	0.56	0.53
	10000	original	0.97	0	0
		bias-corrected	0.05	0.46	0.43
	20000	original	0.81	0	0
		bias-corrected	0.04	0.74	0.7
	50000	original	0	0	0
		bias-corrected	0	0.31	0.33
	100000	original	0	0.89	0.87
		bias-corrected	0.34	0	0
	200000	original	0	0.01	0.01
		bias-corrected	0.12	0	0
0.191	5000	original	0.65	1	0.99
		bias-corrected	0.54	0.67	0.69
	10000	original	0.88	0.55	0.55
		bias-corrected	0.15	0.5	0.52
	20000	original	0.99	0	0
		bias-corrected	0.09	0.68	0.66
	50000	original	0.04	0	0
		bias-corrected	0	0.76	0.75
	100000	original	0	0.04	0.02
		bias-corrected	0.35	0.03	0.03
	200000	original	0	0.64	0.44
		bias-corrected	0.15	0	0
0.101	5000	original	0	0.02	0.01
		bias-corrected	0.54	0.6	0.58
	10000	original	0.56	0.95	0.95
		bias-corrected	0.62	0.7	0.7
	20000	original	0.83	0.99	0.98
		bias-corrected	0.47	0.75	0.77
	50000	original	0.48	0.11	0.16
		bias-corrected	0.09	0.78	0.78
	100000	original	0.08	0	0
		bias-corrected	0	0.54	0.58
	200000	original	0.03	0.55	0.62
		bias-corrected	0.53	0	0

## Sheet: S2 Union CI
	Table S2 Coverage and other properties of the union CI (UCI)
True Sum_Vg	N	Union CI Type	Coverage Probability	Mean of CI Width	Median of CI Width	Mean Distance to the true Vg	Median Distance to the true Vg
0.295	5000	Standard	0.75	0.324837	0.303325	0.0079279	0
		Percentile	1	0.421743	0.371357	0	0
		Standard+Percentile	1	0.43297	0.389026	0	0
	10000	Standard	0.6	0.225751	0.220641	0.0137617	0
		Percentile	0.99	0.278428	0.269183	9.62334e-06	0
		Standard+Percentile	0.99	0.282741	0.275693	9.62334e-06	0
	20000	Standard	0.89	0.14829	0.147923	0.00110528	0
		Percentile	0.91	0.156755	0.155023	0.000315114	0
		Standard+Percentile	0.97	0.164122	0.163103	3.9399e-05	0
	50000	Standard	1	0.166426	0.160322	0	0
		Percentile	1	0.172725	0.166764	0	0
		Standard+Percentile	1	0.190916	0.181149	0	0
	100000	Standard	1	0.123245	0.119002	0	0
		Percentile	1	0.0965156	0.0835409	0	0
		Standard+Percentile	1	0.128586	0.119742	0	0
	200000	Standard	0.96	0.0811419	0.0810992	2.36397e-05	0
		Percentile	0.13	0.0402848	0.0383001	0.00584907	0.0060531
		Standard+Percentile	0.96	0.0811419	0.0810992	2.36397e-05	0
0.191	5000	Standard	0.97	0.304796	0.278888	0.000833452	0
		Percentile	1	0.388271	0.343261	0	0
		Standard+Percentile	1	0.399574	0.358436	0	0
	10000	Standard	0.67	0.179058	0.172495	0.00714199	0
		Percentile	1	0.236128	0.227392	0	0
		Standard+Percentile	1	0.240366	0.228092	0	0
	20000	Standard	0.84	0.123281	0.122937	0.00169901	0
		Percentile	1	0.139586	0.139973	0	0
		Standard+Percentile	1	0.143385	0.141727	0	0
	50000	Standard	1	0.109911	0.110339	0	0
		Percentile	1	0.121652	0.122598	0	0
		Standard+Percentile	1	0.130007	0.129555	0	0
	100000	Standard	1	0.092308	0.086349	0	0
		Percentile	1	0.0695518	0.060352	0	0
		Standard+Percentile	1	0.0947551	0.086349	0	0
	200000	Standard	1	0.064895	0.0639785	0	0
		Percentile	0.66	0.0355759	0.0340867	0.000650789	0
		Standard+Percentile	1	0.0649048	0.0639785	0	0
0.101	5000	Standard	0.77	0.311926	0.276107	0.00898483	0
		Percentile	0.78	0.406043	0.342331	0.00354622	0
		Standard+Percentile	0.78	0.417238	0.352345	0.00289286	0
	10000	Standard	0.94	0.151543	0.140875	0.000549633	0
		Percentile	1	0.195575	0.181854	0	0
		Standard+Percentile	1	0.199827	0.185604	0	0
	20000	Standard	0.96	0.0902897	0.08927	0.000249678	0
		Percentile	1	0.111446	0.106508	0	0
		Standard+Percentile	1	0.114366	0.112028	0	0
	50000	Standard	0.9	0.0594635	0.0592939	0.000360063	0
		Percentile	1	0.0663551	0.0635987	0	0
		Standard+Percentile	1	0.0706129	0.0683803	0	0
	100000	Standard	1	0.0682158	0.0644686	0	0
		Percentile	1	0.0689284	0.0603659	0	0
		Standard+Percentile	1	0.0784044	0.0681163	0	0
	200000	Standard	1	0.0504676	0.0485418	0	0
		Percentile	1	0.0352287	0.0321874	0	0
		Standard+Percentile	1	0.0513799	0.0486522	0	0

## Sheet: Notes to tableS2
	Notes to Table S2
	The following methods were explored:
	1. Normal approximation (standard approach), without bias correction (one estimator) or with bootstrap bias correction (3 estimators), then take the union of CIs; ("Standard")
	2. Percentile approach, without bias correction (3 estimators) and with bias correction (3 estimators), then take the union of CIs; ("Percentile")
	3. Union of the final CI obtained from 1 and 2. ("Standard+Percentile")
	Distance to the true Vg: this is the distance of the CI to the true Vg. If the CI does not cover the true Vg, the distance is computed by min(absolute distance of the lower CI to true Vg, absolute distance of the upper CI to true Vg)
	If the CI covers the true Vg, the distance is zero.

## Sheet: S3 computational time
Table S3 Computational time for resampling approaches (100,000 SNPs and 200 resampling iterations for each approach)
	Average Time(min)
	jack1	jack_del_d	paraboot	fdrboot1	fdrboot2
Vg=0.101	2.43143	1.86445	2.42633	3.61912	3.63245
Vg=0.191	2.50159	1.94365	2.53304	3.80689	3.8497
Vg=0.295	2.475	1.92473	2.51662	3.796	3.82716
The computational time is averaged over 10 simulations.
